# Supplementary material for: Efficacy, safety, and tolerability of secukinumab in patients with active ankylosing spondylitis: a randomized, double-blind phase 3 study, MEASURE 3
Source: PubMed Central journal article supplement (PMC5741872; doi:10.1186/s13075-017-1490-y), 2017-12-22

Loading

Treatment

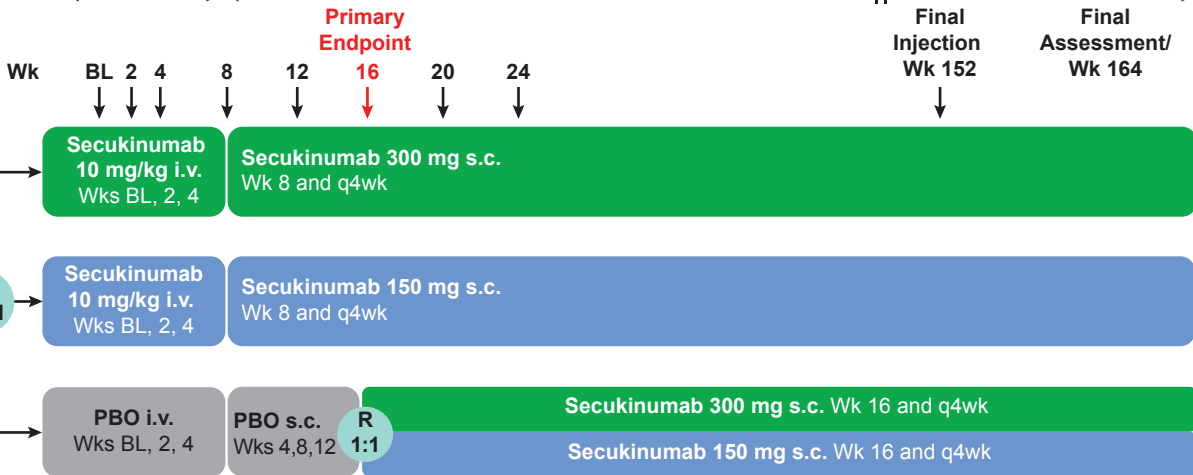

Supplement: 13075_2017_1490_MOESM1_ESM.pdf [file 13075_2017_1490_MOESM1_ESM.pdf]
